# Supplementary material for: Are dietary inequalities among Australian adults changing? a nationally representative analysis of dietary change according to socioeconomic position between 1995 and 2011–13
Source: PubMed Central journal article supplement (PMC5879763; doi:10.1186/s12966-018-0666-4), 2018-04-02
Supplement: 12966_2018_666_MOESM2_ESM.pdf [file 12966_2018_666_MOESM2_ESM.pdf]

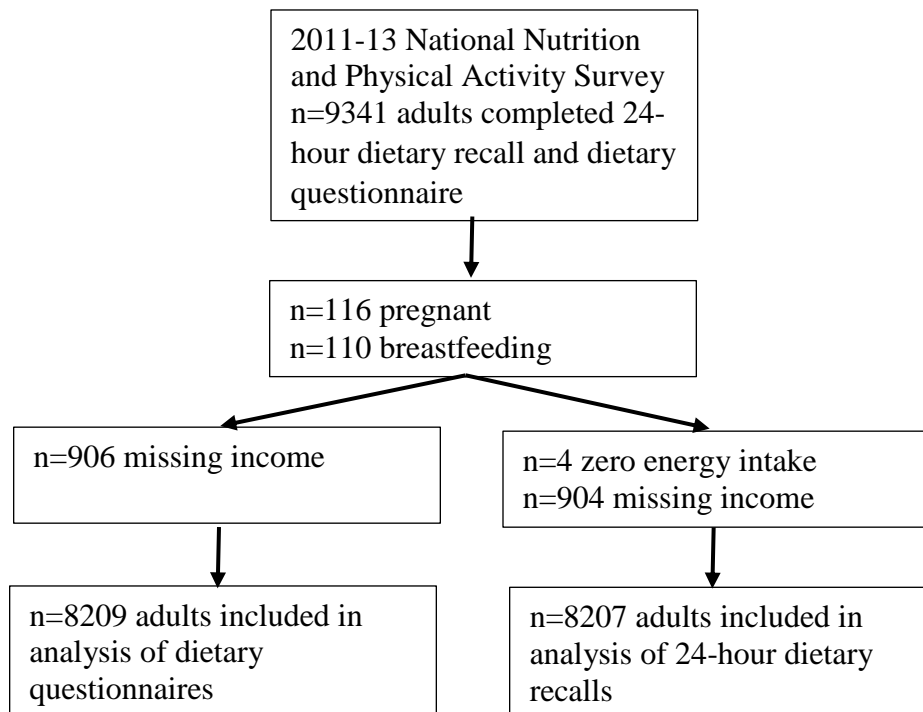

**Additional File 2.** 2011-13 National Nutrition and Physical Activity Survey flow diagram
